# Supplementary material for: Assembly of a dinuclear silver complex containing an Ag2S2 motif from a phosphorus-supported trishydrazone ligand. PS→AgI coordination
Source: Royal Society of Chemistry journal article supplement (doi:10.1039/c1dt10294j), 2011-01-01
Supplement: c1dt10294j.pdf [file c1dt10294j.pdf]

## **Electronic Supplementary Information**

### **Assembly of a dinuclear silver complex containing an $\text{Ag}_2\text{S}_2$ motif from a phosphorus-supported trishydrazone ligand. $\text{P}=\text{S} \rightarrow \text{Ag}^{\text{I}}$ coordination**

**Vadapalli Chandrasekhar,\* Mrituanjay D. Pandey and Kandasamy Gopal**

*Department of Chemistry, Indian Institute of Technology- Kanpur, Kanpur-208016, India.*

**Table S1** Hydrogen-bonding parameters in the crystal structures **2**, **2.3H<sub>2</sub>O**, **2.2MeOH** and **3.4MeCN**.

| Structure                | D-H---A                            | H---A (Å)                         | D---A (Å) | D-H---A (°) | Symmetry                  |                          |
|--------------------------|------------------------------------|-----------------------------------|-----------|-------------|---------------------------|--------------------------|
| <b>2</b>                 | C8-H8---C6( $\pi$ ) <sup>a</sup>   | 2.940(2)                          | 3.889(3)  | 178.11(2)   | x, y, z                   |                          |
|                          | C24-H24---C4( $\pi$ ) <sup>a</sup> | 2.916(2)                          | 3.845(3)  | 166.05(2)   | x, y, z                   |                          |
|                          | C33-H33---C5( $\pi$ ) <sup>a</sup> | 2.886(2)                          | 3.823(3)  | 169.14(2)   | x, y, z                   |                          |
|                          | C1-H1A---N6                        | 2.512(2)                          | 3.247(4)  | 131.67(2)   | 1.5-x, -0.5+y, 0.5-z      |                          |
|                          | C2-H2A---N3                        | 2.529(3)                          | 3.396(4)  | 147.44(2)   | 1.5-x, -0.5+y, 0.5-z      |                          |
|                          | C21-H21--- $\pi$                   | 2.921(8)                          | 3.763(2)  | 148.41(2)   | 1+x, 1+y, z               |                          |
|                          | C29-H29---S1                       | 2.833(7)                          | 3.468(7)  | 125.11(2)   | 1+x, y, z                 |                          |
|                          | $\pi$ --- $\pi$ <sup>b</sup>       |                                   | 3.629(7)  |             | 0.5-x, 1.5+y, 1.5-z       |                          |
| <b>2.3H<sub>2</sub>O</b> | S1--- $\pi$ <sup>a</sup>           |                                   | 3.619(2)  |             | 1-x+y, 1-x, -1+z          |                          |
|                          | N1--- $\pi$ <sup>a</sup>           |                                   | 3.659(3)  |             | 1-x+y, 1-x, z             |                          |
|                          | O1-H1W---N3 <sup>a</sup>           | 1.958(3)                          | 2.877(3)  | 172.48(4)   | x, y, z                   |                          |
|                          | O1-H2W---O1                        | 2.035(5)                          | 2.890(3)  | 174.51(5)   | 0.67-y, -0.67+x+y, 0.33+z |                          |
|                          |                                    | $\pi$ --- $\pi$ <sup>c</sup>      |           | 3.759(3)    |                           | 1.33-y, 0.67+x-y, 1.67+z |
| <b>2.2MeOH</b>           | C6-H6---N4 <sup>a</sup>            | 2.833(2)                          | 3.648(3)  | 146.93(16)  | x, y, z                   |                          |
|                          |                                    | $\pi$ --- $\pi$ <sup>a,c</sup>    |           | 3.627(3)    | x, y, z                   |                          |
|                          | O2-H2---N7 <sup>a</sup>            | 2.048(6)                          | 2.855(8)  | 167.79(15)  | x, y, z                   |                          |
|                          | O1-H1---N9                         | 2.108(3)                          | 2.870(4)  | 154.44(15)  | -1+x, y, z                |                          |
|                          | C3-H3A---O2                        | 2.534(11)                         | 3.474(16) | 166.37(17)  | 1+x, y, z                 |                          |
|                          | C9-H9---O1                         | 2.612(8)                          | 3.411(10) | 144.34(18)  | 1-x, -y, 2-z              |                          |
|                          | C7-H7--- $\pi$                     | 2.812(8)                          | 3.504(9)  | 132.05(16)  | 2-x, -y, 2-z              |                          |
|                          | C19-H19--- $\pi$                   | 2.673(8)                          | 3.500(10) | 148.44(17)  | x, y, z                   |                          |
|                          |                                    | $\pi$ --- $\pi$ (N7) <sup>b</sup> |           | 3.383(11)   |                           | 1-x, -y, 2-z             |
|                          | C29-H29---S1                       | 3.006(10)                         | 3.814(12) | 146.19(21)  | 2-x, -y, 1-z              |                          |
|                          | C1-H1B---S1                        | 3.012(9)                          | 3.696(11) | 129.38(17)  | 1-x, 1-y, 1-z             |                          |
|                          | C35-H35A---S1                      | 3.003(11)                         | 3.658(13) | 126.64(21)  | 1-x, 1-y, 1-z             |                          |
|                          |                                    | $\pi$ --- $\pi$ (N9) <sup>b</sup> |           | 3.660(15)   |                           | -1+x, 1+y, z             |
| <b>3.4MeCN</b>           | C28-H28--- $\pi$                   | 2.632(8)                          | 3.535(11) | 164.08(4)   | 2-x, -y, 1-z              |                          |
|                          |                                    | $\pi$ --- $\pi$ <sup>b</sup>      |           | 3.495(3)    | 2-x, -y, 1-z              |                          |
|                          |                                    | $\pi$ --- $\pi$ (N8) <sup>b</sup> |           | 3.569(9)    | 2-x, -y, 2-z              |                          |
|                          | C7-H7---S1                         | 2.986(8)                          | 3.762(8)  | 141.88(4)   | -1+x, y, z                |                          |
|                          |                                    | $\pi$ --- $\pi$ <sup>b</sup>      |           | 3.556(9)    | 1-x, 1-y, 1-z             |                          |
|                          | C36-H36C---N8                      | 2.570(8)                          | 3.510(12) | 166.65(5)   | 2-x, -y, 2-z              |                          |
|                          | C2-H2C---N11                       | 2.588(17)                         | 3.520(11) | 164.10(5)   | 1+x, -1+y, z              |                          |
|                          | C9-H9---O1                         | 2.423(8)                          | 3.338(13) | 168.20(5)   | x, y, z                   |                          |
|                          | C18-H18---O2                       | 2.684(8)                          | 3.522(11) | 150.41(5)   | 1-x, -y, 1-z              |                          |
|                          | C24-H24---O2                       | 2.440(9)                          | 3.219(12) | 141.39(4)   | 1+x, y, z                 |                          |
|                          | C26-H26---O2                       | 2.696(9)                          | 3.489(11) | 143.69(4)   | 1+x, y, z                 |                          |
|                          | C36-H36A---O2                      | 2.453(9)                          | 3.380(12) | 162.43(6)   | 1-x, -y, 1-z              |                          |
|                          | C3-H3A---O3                        | 2.695(8)                          | 3.357(13) | 126.63(4)   | 1+x, y, z                 |                          |
|                          | C3-H3B---O3                        | 2.417(9)                          | 3.217(14) | 140.63(4)   | 1-x, 1-y, -z              |                          |
|                          | C19-H19---O3                       | 2.651(6)                          | 3.553(9)  | 163.78(5)   | 1+x, -1+y, 1+z            |                          |
|                          | C2-H2A---O3                        | 2.653(8)                          | 3.465(10) | 142.62(5)   | 1+x, y, 1+z               |                          |
|                          | C18-H18---O3                       | 2.468(7)                          | 3.337(11) | 155.80(4)   | 1-x, -y, 1-z              |                          |
|                          | C2-H2A---O4                        | 2.517(8)                          | 3.446(11) | 162.66(4)   | 1+x, y, 1+z               |                          |
|                          | C21-H21---O4                       | 2.444(6)                          | 3.370(9)  | 172.84(5)   | 2-x, -y, 1-z              |                          |
|                          | C36-H36B---O4                      | 2.550(9)                          | 3.107(14) | 127.11(14)  | x, y, 1+z                 |                          |

<sup>a</sup> Intramolecular interactions. <sup>b</sup> Parallel displaced  $\pi$ -stacking. <sup>c</sup> T-shaped  $\pi$ -stacking.

**Supramolecular Architecture of 2:** The unsolvated **2** forms a three-dimensional supramolecular architecture which can be explained as follows. Each trishydrozone molecule interacts with two other neighboring molecules by means of four proton donor-acceptor type of C-H...N interactions (H1A...N6 and H2A...N3) resulting in a one-dimensional tape (Fig. S1(a); Table S1). These one-dimensional tapes are connected by C-H...S (H29...S1) and C-H... $\pi$  (H21... $\pi$ ) interactions to form a two-dimensional supramolecular assembly (Fig. S1(a); Table S1). Finally, one of the quinoline arms of each molecule present in the two-dimensional assembly (which involved in C-H...S interaction) is further  $\pi$ -stacked to form a three-dimensional supramolecular architecture (Fig. S1(b); Table S1). The interplanar distance in these interacting quinoline units is 3.629(7) Å (shortest contact of C31...C31: 3.423(11) Å) and their orientation is parallel displaced with a tilt angle of 22.6°.

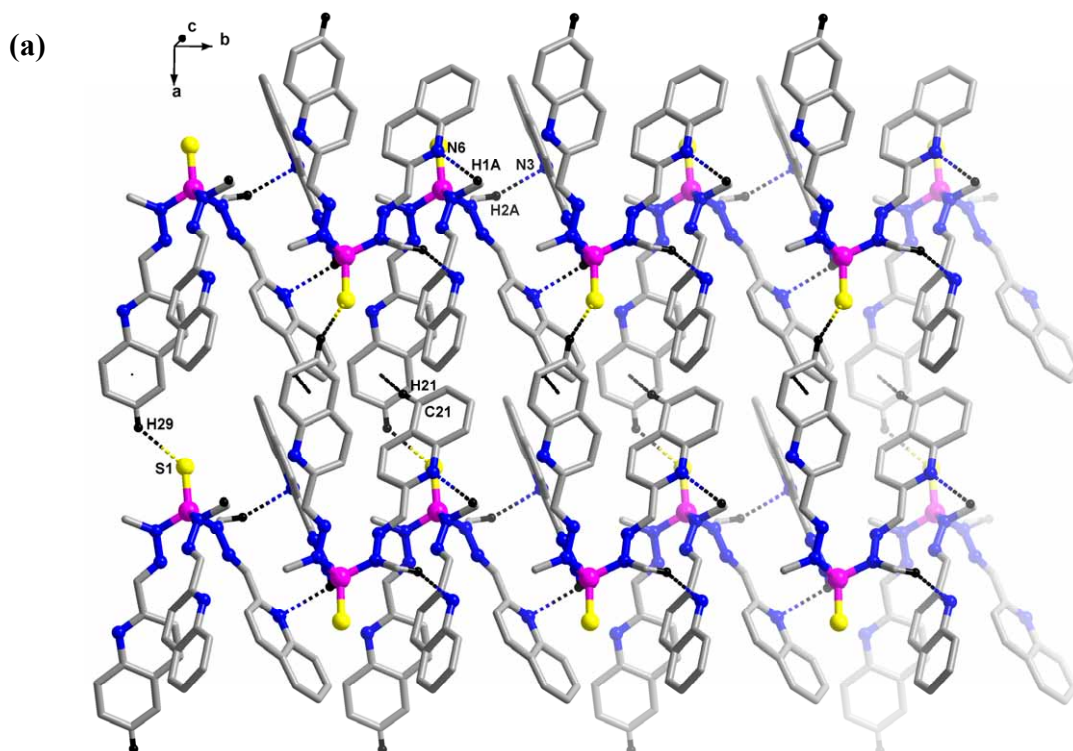

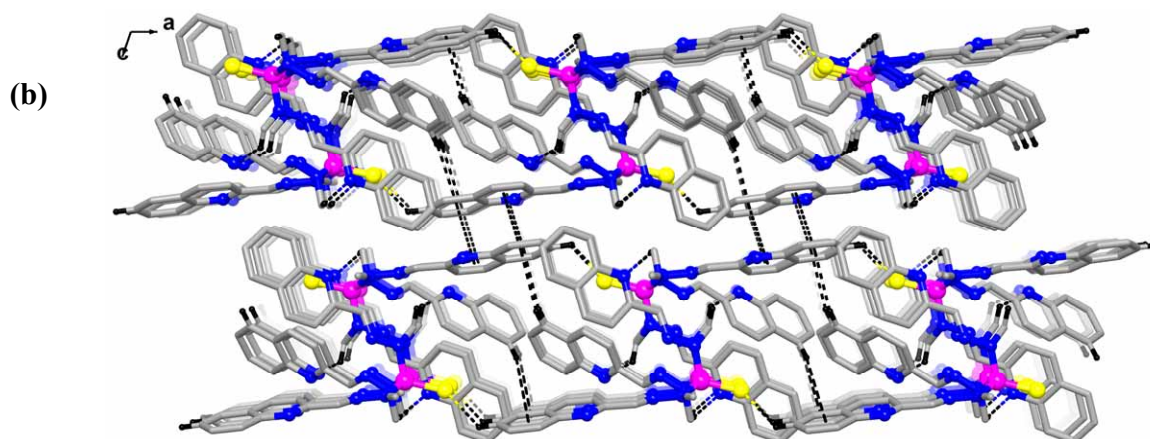

**Fig. S1** View showing two (a) and three-dimensional (b) supramolecular assembly in the crystal structure of **2**.

**Supramolecular Architecture of 2.2MeOH:** The methanol solvated structure of **2** (2.2MeOH) shows rich supramolecular interactions in the solid state. Thus, the trishydrazone molecules are connected to each other by C-H $\cdots$  $\pi$  (H19 $\cdots$  $\pi$ ) and  $\pi$ -stacking interactions to form a one dimensional supramolecular tape (Fig. S2(a); Table S1). The interplanar distance (of interacting quinoline units) for the  $\pi$ -stacking interaction is 3.383(11) Å (shortest contact of C5 $\cdots$ C11: 3.350(12) Å) and their orientation is parallel displaced with a tilt angle of 21.6°. In addition, the lattice methanol molecules are also found in contact with trishydrazone molecules through C-H $\cdots$ O (H9 $\cdots$ O1 and H3A $\cdots$ O2) and O-H $\cdots$ N (H1 $\cdots$ N9 and H2 $\cdots$ N7) interactions to glue the supramolecular tape (Fig. S2(a); Table S1). These tapes are interconnected by three C-H $\cdots$ S interactions (H1B $\cdots$ S1, H29 $\cdots$ S1 and H35A $\cdots$ S1) to form the three-dimensional supramolecular architecture (Fig. S2(a); Table S1).

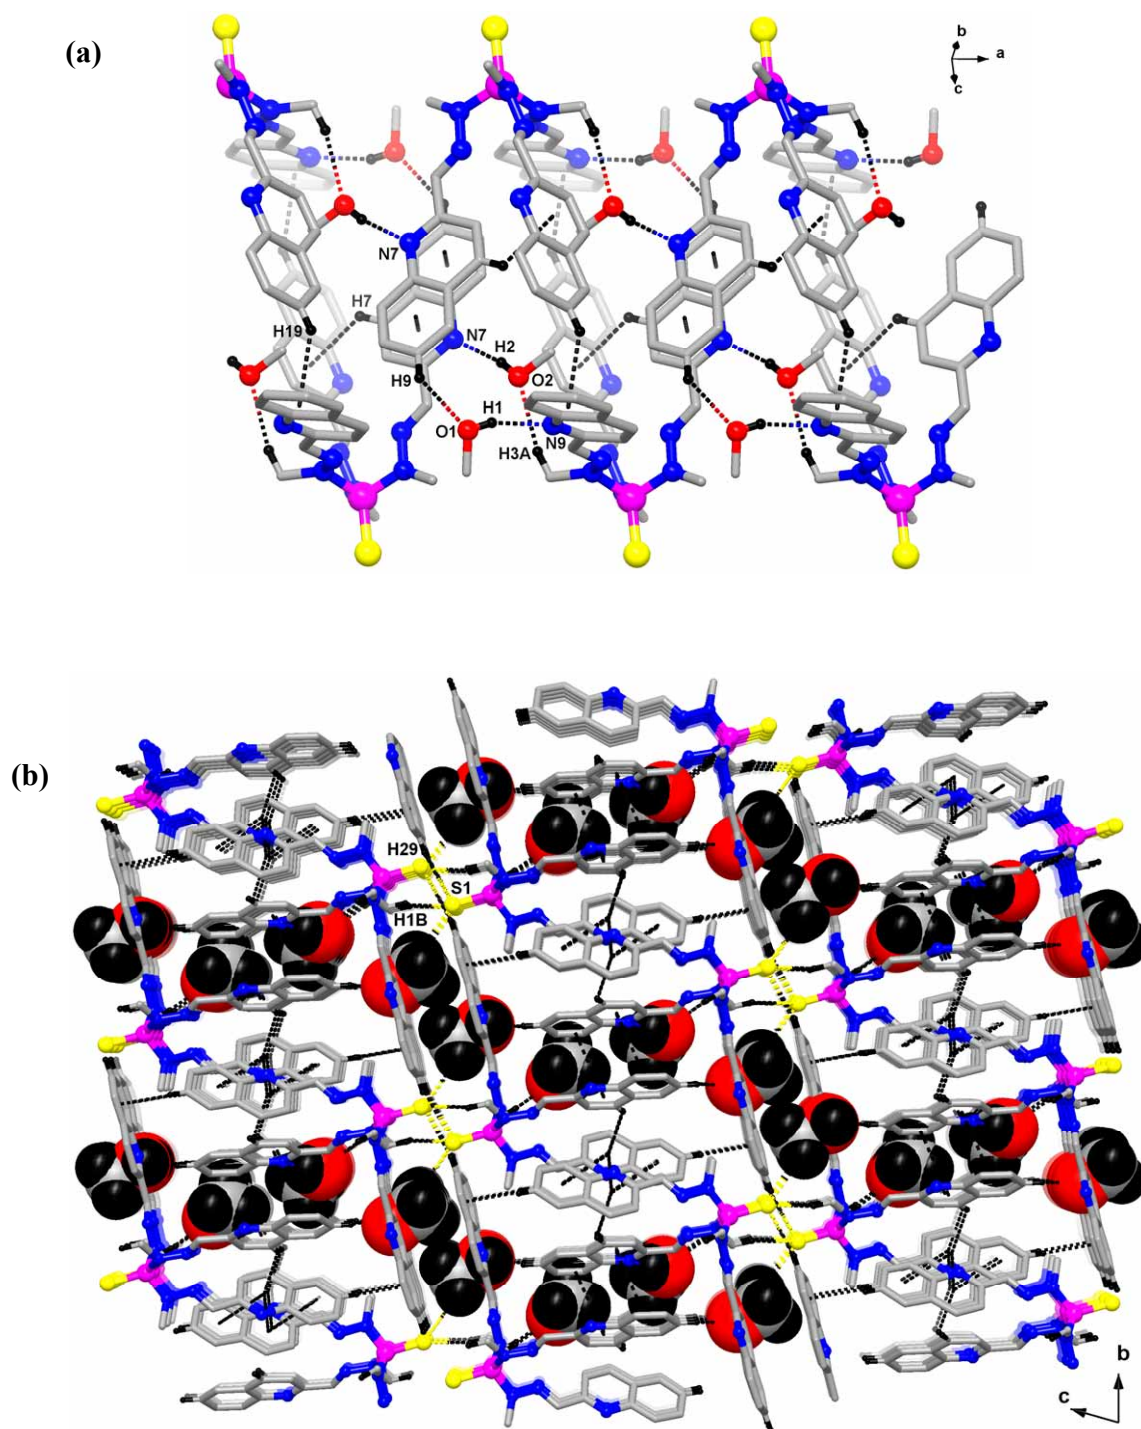



**Supramolecular Architecture of 3:** A closer inspection of the crystal structure of **3** reveals that it also forms three-dimensional supramolecular architecture through extensive hydrogen-bonding interactions. Thus, the cationic molecules of **3** form a one-dimensional network mediated by C-H $\cdots$  $\pi$  (H28 $\cdots$  $\pi$ ) and  $\pi$ -stacking interactions (Fig. S3(a); Table S1). The  $\pi$ -stacking is parallel displaced interaction with the interplanar distance of 3.495(3) Å (shortest contact of C28 $\cdots$ C33: 3.477(3) Å) and with a tilt angle of 22.1°. Such one-dimensional networks are connected each other by another  $\pi$ -stacking interaction to form the two-dimensional supramolecular network (Fig. S3(a); Table S1). This  $\pi$ -stacking also parallel displaced interaction with the interplanar distance of 3.569(3) Å (shortest contact of C15 $\cdots$ C17: 3.533(3) Å) and a tilt angle of 21.3°. These two-dimensional networks are further connected through a C-H $\cdots$ S (H7 $\cdots$ S1) and a  $\pi$ -stacking interaction to form the three-dimensional supramolecular architecture (Fig. S3(b); Table S1). This  $\pi$ -stacking also is parallel displaced with an interplanar distance of 3.556(9) Å (shortest contact of C6 $\cdots$ C12: 3.546(9) Å) and with a tilt angle of 31.3°. In addition, numerous C-H $\cdots$ O and C-H $\cdots$ N interactions are seen in the crystal structure between lattice solvent molecules (MeCN), perchlorate anions and protons of the cationic molecules (Fig. S3(b); Table S1).

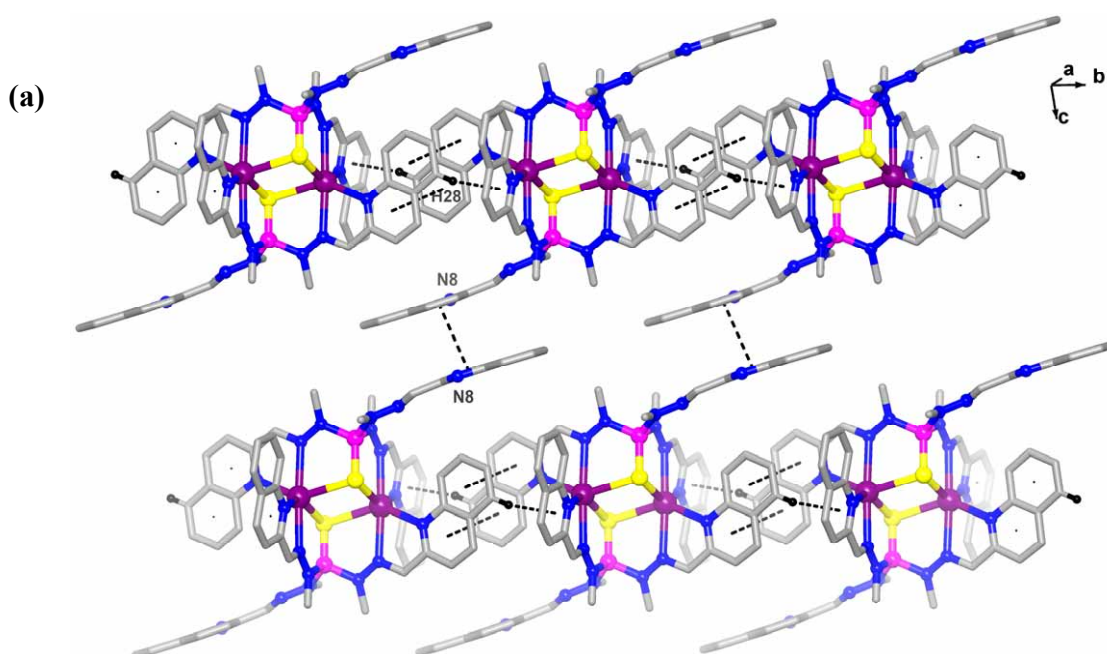

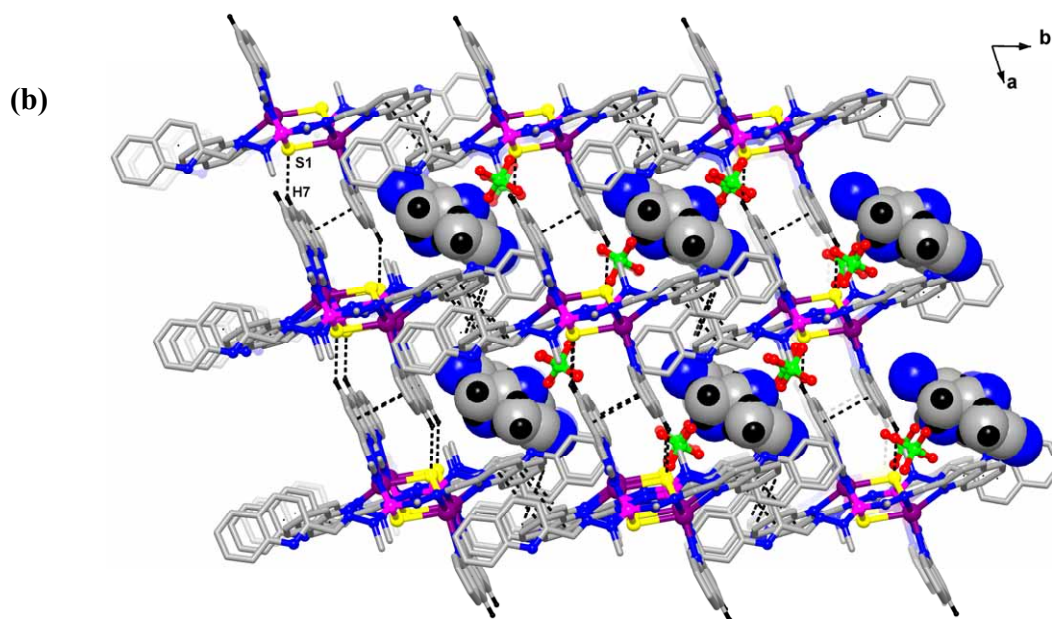

**Fig. S3** View showing two- (a) and three-dimensional (b) supramolecular assembly in the crystal structure of **3**
